# Supplementary material
Source: PubMed Central journal article supplement (PMC1829272)

**A**

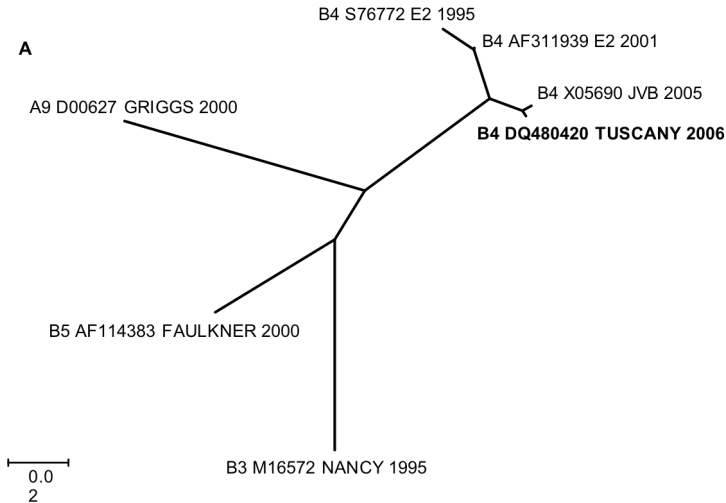

**B**

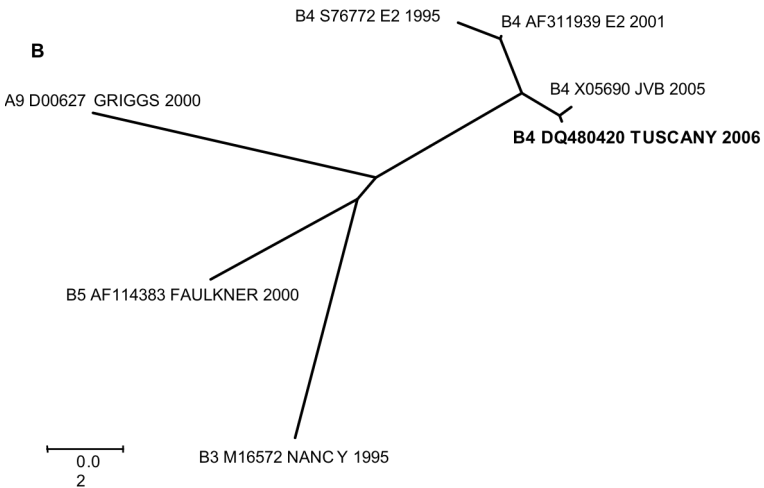

Supplement: pnas_0700442104_1.pdf [file pnas_0700442104_1.pdf]

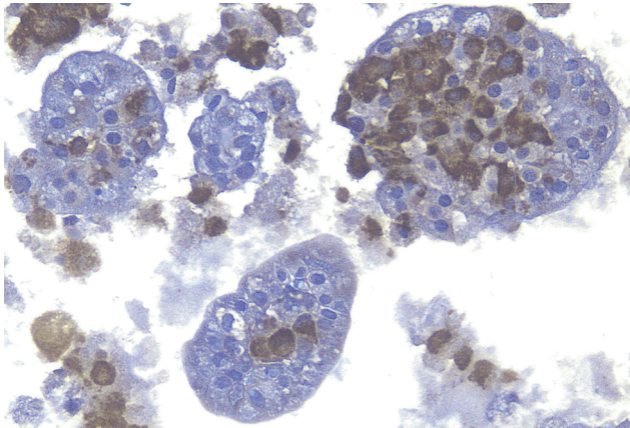

Supplement: pnas_0700442104_2.pdf [file pnas_0700442104_2.pdf]
